# Supplementary material for: Drug Delivery System Based on pH-Sensitive Biocompatible Poly(2-vinyl pyridine)-b-poly(ethylene oxide) Nanomicelles Loaded with Curcumin and 5-Fluorouracil
Source: PubMed Central journal article supplement (PMC7408444; doi:10.3390/polym12071450), 2020-06-28
Supplement: polymers-12-01450-s001.pdf [file polymers-12-01450-s001.pdf]

## Supplementary Materials

# Drug Delivery System Based on pH-Sensitive Biocompatible Poly(2-vinyl pyridine)-*b*-poly(ethylene oxide) Nanomicelles Loaded with Curcumin and 5-Fluorouracil

Camelia-Elena Iurciuc-Tincu <sup>1,2</sup>, Monica Stamate Cretan <sup>1</sup>, Violeta Purcar <sup>3</sup>, Marcel Popa <sup>2,4</sup>, Oana Maria Daraba <sup>5</sup>, Leonard Ionut Atanase <sup>5,\*</sup> and Lacramioara Ochiuz <sup>1</sup>

<sup>1</sup> Faculty of Pharmacy, "Grigore T. Popa" University of Medicine and Pharmacy, Department of Pharmaceutical Technology, University street, no. 16, 700115 Iași, Romania; camelia\_tincu83@yahoo.com (C.-E.I.-T.); cretanmonica@yahoo.com (M.S.C.); ochiuzd@yahoo.com (L.O.)

<sup>2</sup> "Gheorghe Asachi" Technical University, Faculty of Chemical Engineering and Protection of the Environment, Department of Natural and Synthetic Polymers, 700050 Iași, Romania; marpopa2001@yahoo.fr

<sup>3</sup> National R&D Institute for Chemistry and Petrochemistry—ICECHIM, Splaiul Independentei 202, 6th district, Bucharest, Romania; purcarvioleta@gmail.com

<sup>4</sup> Academy of Romanian Scientists, Splaiul Independentei Street No. 54, 050085 Bucharest, Romania

<sup>5</sup> Faculty of Dental Medicine, "Apollonia" University of Iasi, Pacurari street, no. 11, 700355 Iași, Romania; maria.mary2019@yahoo.com

\* Correspondence: leonard.atanase@yahoo.com or leonard.atanase@univapollonia.ro

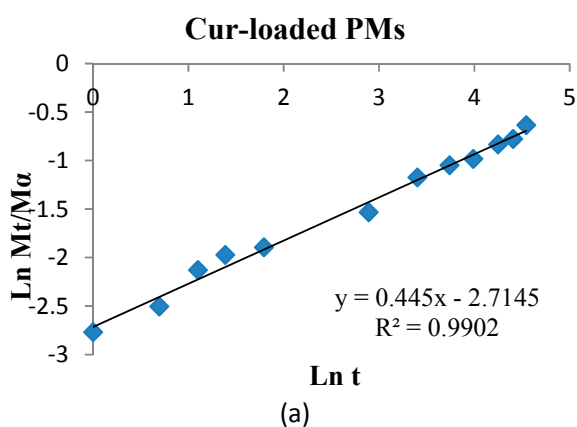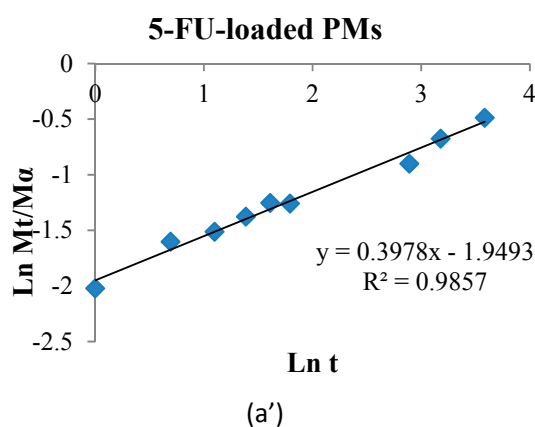

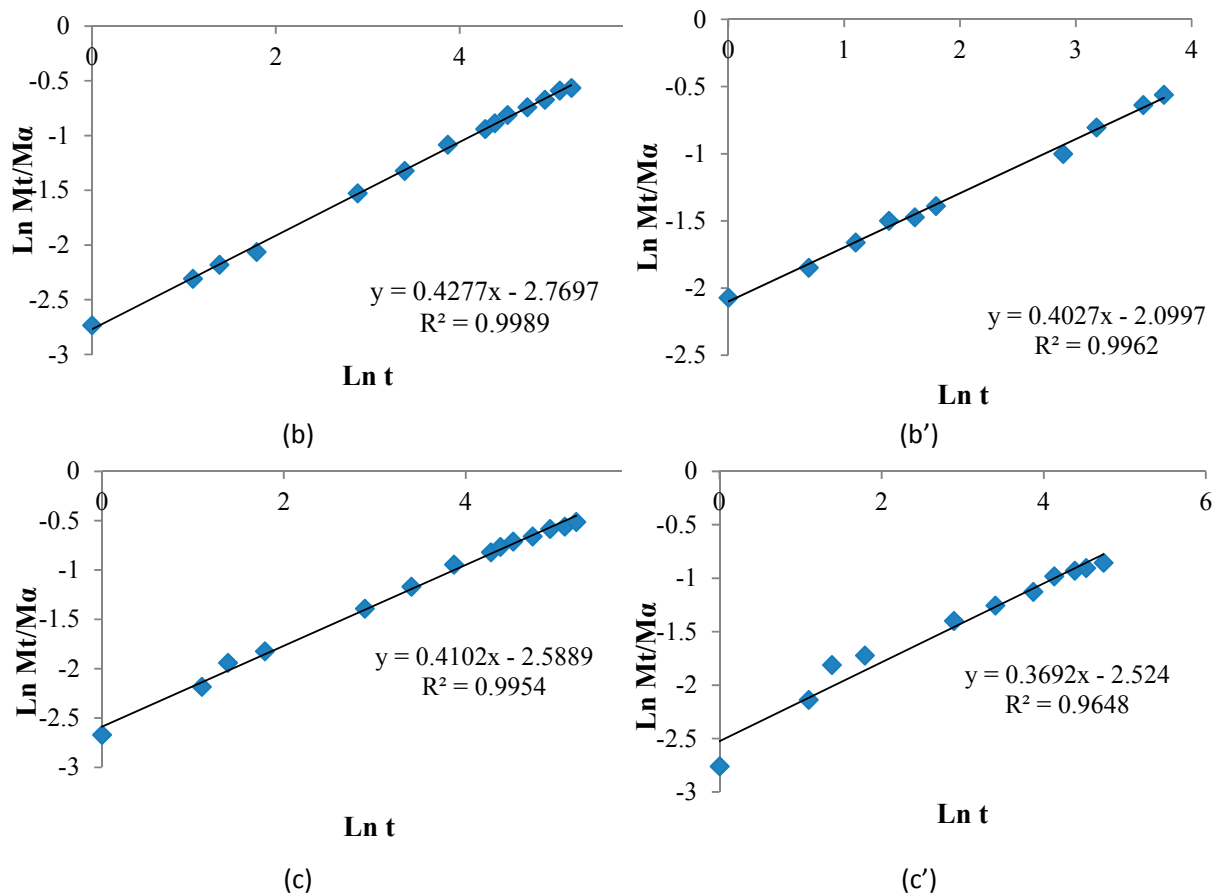

**Figure S1:** Graphical representations of  $\ln(\text{release efficiency})$  vs  $\ln(\text{time})$  for Cur-loaded PMs and 5-FU-loaded PMs at pH 2 (a, a'); 6.8 (b, b') and 7 (c, c')

**Table S1:** Peaks assignments for free Cur, free P2VP<sub>90</sub>-*b*-PEO<sub>398</sub> copolymer, and Cur-loaded PMs obtained by FTIR

| Groups                 | Frequencies (cm <sup>-1</sup> ) |                                                             |                |
|------------------------|---------------------------------|-------------------------------------------------------------|----------------|
|                        | Curcumin                        | P2VP <sub>90</sub> - <i>b</i> -PEO <sub>398</sub> copolymer | Cur-loaded PMs |
| $\nu_{OH}$ stretching  | 3511                            | 3100-3600                                                   | 3100-3600      |
| $\nu_{CH}$             | 3000-2930                       | 2882                                                        | 2882           |
| $\nu_{CH_2}$           | 3000-2930                       | 2882                                                        | 2882           |
| $\nu_{C=C}$ stretching | 1628                            | -                                                           | 1624           |
| $\nu_{C=C}$ stretching | 1600                            | 1590                                                        | 1590           |

|                                          |             |              |              |
|------------------------------------------|-------------|--------------|--------------|
| $\nu_{C=O}$<br>stretching                | 1600        | 1568         | 1568         |
| $\nu_{C=O}$<br>stretching                | <i>1510</i> | -            | <i>1512</i>  |
| $\delta_{CH_2}$                          | -           | 1469         | 1467         |
| $\nu_{CH}$<br>stretching                 | -           | 1434         | 1434         |
| $\delta_{C-N}$                           | -           | 1360         | 1360         |
| $\nu_{CH_3}$<br>stretching               | -           | 1342         | 1342         |
| $\nu_{C-O}$ (in<br>phenol)<br>stretching | 1280        | 1280<br>1241 | 1280<br>1241 |
| $\nu_{C-O-C}$<br>stretching              | -           | 1147         | 1146         |
| $\delta_{C-N}$                           | -           | 1103         | 1101         |
| $\nu_{CH_2}$                             | -           | 1061         | 1061         |
| $\delta_{C-H}$                           | <i>975</i>  | -            | <i>994</i>   |
| $\delta_{C-N}$                           | -           | 961<br>842   | 961<br>842   |
| $\nu_{N-H}$<br>stretching                | 788         | 748          | 748          |
| $\delta_{C-CH}$                          | 788         | 748          | 748          |

**Table S2:** Peaks assignments for free 5-FU, free P2VP<sub>90</sub>-*b*-PEO<sub>398</sub> copolymer, and 5-FU-loaded PMs obtained by FTIR

| Groups                                      | Frequencies (cm <sup>-1</sup> ) |                                                                |                 |
|---------------------------------------------|---------------------------------|----------------------------------------------------------------|-----------------|
|                                             | 5-FU                            | P2VP <sub>90</sub> - <i>b</i> -PEO <sub>398</sub><br>copolymer | 5-FU-loaded PMs |
| v <sub>OH</sub> stretching                  | -                               | 3100-3600                                                      | 3100-3600       |
| v <sub>CH</sub> stretching                  | 2800-3100                       | 2882                                                           | 2882            |
| δ <sub>N-H</sub>                            | 2800-3100                       | 2882                                                           | 2882            |
| v <sub>CH2</sub> stretching                 | 2800-3100                       | 2882                                                           | 2882            |
| v <sub>C=C</sub> ring stretching vibrations | 1661                            | 1590                                                           | 1590            |
| v <sub>C=O</sub> stretching                 | 1661                            | 1568                                                           | 1568            |
| δ <sub>CH2</sub>                            | 1450                            | 1469                                                           | 1469            |
| v <sub>CH</sub>                             | 1430                            | 1434                                                           | 1434            |
| δ <sub>C-N</sub>                            | 1349                            | 1360                                                           | 1360            |
| v <sub>CH3</sub> stretching                 | 1349                            | 1342                                                           | 1342            |
| v <sub>CH</sub>                             | 1246                            | 1280                                                           | 1280            |
| v <sub>CH2</sub>                            | 1246                            | 1241                                                           | 1241            |
| v <sub>C-O-C</sub> stretching               | 1182                            | 1147                                                           | 1147            |
| δ <sub>C-N</sub>                            | 1182                            | 1103                                                           | 1101            |
| v <sub>CH2</sub>                            | -                               | 1061                                                           | 1061            |
| v <sub>C-N</sub> stretching                 | 948                             | 961                                                            | 961             |
| v <sub>C-F</sub> stretching                 | 880                             | 842                                                            | 842             |
| v <sub>N-H</sub> stretching                 | 752                             | 748                                                            | 748             |
| v <sub>C-CH</sub> stretching                | 752                             | 748                                                            | 748             |
